# Supplementary material
Source: MDPI journal article supplement (https://www.mdpi.com/2073-4433/7/4/57)
Supplement: s1 [file s1]

# Supplemental Materials: Effect of Pollution Controls on Atmospheric PM<sub>2.5</sub> Composition during Universiade in Shenzhen, China. *Atmosphere* 2016, 7, 57, doi:10.3390/atmos7040057

Nitika Dewan, Yu-Qin Wang, Yuan-Xun Zhang, Yang Zhang, Ling-Yan He, Xiao-Feng Huang and Brian J. Majestic

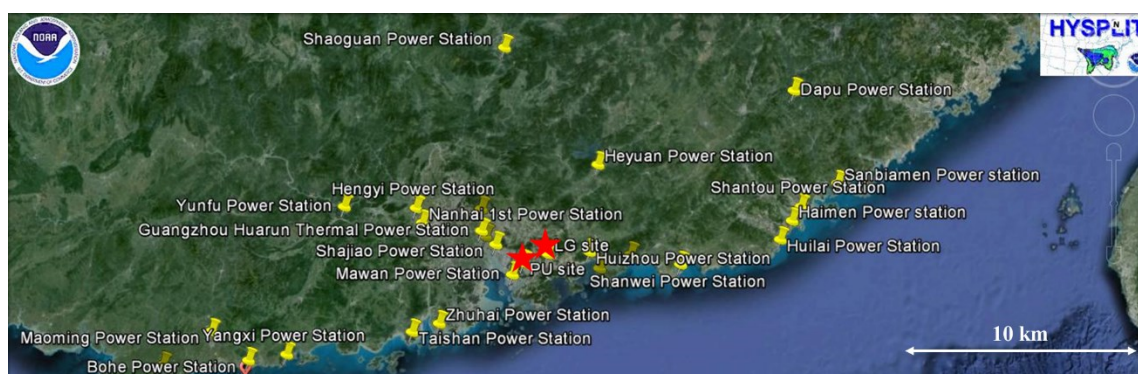

**Figure S1.** Map showing the location of the PU and LG sampling sites (shown as red stars) relative to the location of power plants in Guangdong Province.

**Table S1.** Principal component loadings of selected elements and ions for PU and LG sites during controlled periods.

| Element                       | PC1:<br>Combustion source | PC2: Residual Oil<br>Combustion &<br>Secondary Aerosols | PC3:<br>Sea Spray |
|-------------------------------|---------------------------|---------------------------------------------------------|-------------------|
| Fe                            | <u>0.574</u>              | -                                                       | -0.415            |
| Pb                            | <b>0.905</b>              | -                                                       | -                 |
| Zn                            | <b>0.929</b>              | -                                                       | -                 |
| Sb                            | -                         | -0.229                                                  | -                 |
| OC                            | <u>0.567</u>              | 0.641                                                   | -                 |
| K <sup>+</sup>                | <b>0.882</b>              | -                                                       | 0.339             |
| Al                            | <u>0.747</u>              | 0.314                                                   | -                 |
| NH <sub>4</sub> <sup>+</sup>  | -                         | <u>0.737</u>                                            | <u>0.556</u>      |
| SO <sub>4</sub> <sup>2-</sup> | 0.224                     | <u>0.675</u>                                            | <u>0.651</u>      |
| Cl <sup>-</sup>               | -                         | -                                                       | <u>0.627</u>      |
| V                             | -                         | <b>0.924</b>                                            | -                 |
| Ni                            | -                         | <b>0.925</b>                                            | -                 |
| Na <sup>+</sup>               | <u>0.620</u>              | -                                                       | <u>0.664</u>      |
| Se                            | <u>0.714</u>              | 0.309                                                   | -                 |
| Mg <sup>2+</sup>              | -                         | -                                                       | <b>0.887</b>      |
| Eigen Value                   | 4.68                      | 3.47                                                    | 2.30              |
| % of Variance                 | 31                        | 23                                                      | 15                |

Note: Variables with loading factors above 0.8 are in bold font and variables with loading factors between 0.5 and 0.7 are underlined and italicized. Blank values indicate loading factors <0.200.

**Table S2.** Principal component loadings of selected elements and ions for PU and LG sites during uncontrolled periods.

| Element                       | PC1:<br>Secondary<br>Aerosols | PC2:<br>Undetermined | PC3:<br>Sea Spray | PC4: Residual<br>Oil Combustion | PC5: Combustion<br>Emission |
|-------------------------------|-------------------------------|----------------------|-------------------|---------------------------------|-----------------------------|
| Pb                            | -                             | 0.384                | -                 | -                               | <b>0.810</b>                |
| OC                            | 0.232                         | -                    | -                 | -                               | <b>0.868</b>                |
| Se                            | -                             | <b>0.862</b>         | -                 | -0.255                          | 0.228                       |
| Cl <sup>-</sup>               | -                             | -                    | <u>0.750</u>      | 0.288                           | 0.374                       |
| Mg <sup>+2</sup>              | -0.274                        | -0.454               | <u>0.722</u>      | -                               | -                           |
| Zn                            | -                             | -                    | -                 | -                               | -                           |
| Fe                            | 0.443                         | -                    | -                 | -                               | -                           |
| Al                            | -                             | <b>0.909</b>         | -                 | -                               | -                           |
| K <sup>+</sup>                | <u>0.699</u>                  | <u>0.583</u>         | 0.217             | -                               | -                           |
| NH <sub>4</sub> <sup>+</sup>  | <b>0.908</b>                  | -                    | -                 | -                               | -                           |
| SO <sub>4</sub> <sup>2-</sup> | <b>0.899</b>                  | -                    | -                 | -                               | 0.205                       |
| Sb                            | <u>0.794</u>                  | -0.380               | -                 | -                               | -                           |
| Na <sup>+</sup>               | 0.233                         | 0.436                | <b>0.807</b>      | -                               | -                           |
| V                             | -                             | -0.319               | -                 | <b>0.836</b>                    | -                           |
| Ni                            | -                             | -                    | -                 | <b>0.927</b>                    | -                           |
| Eigen value                   | 3.17                          | 2.81                 | 1.85              | 1.84                            | 1.73                        |
| % of Variance                 | 21                            | 19                   | 12                | 12                              | 11                          |

Note: Variables with loading factors above 0.8 are in bold font and variables with loading factors between 0.5 and 0.7 are underlined and italicized. Blank values indicate loading factors <0.200.

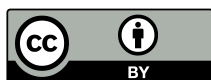

© 2016 by the authors; licensee MDPI, Basel, Switzerland. This article is an open access article distributed under the terms and conditions of the Creative Commons by Attribution (CC-BY) license (<http://creativecommons.org/licenses/by/4.0/>).
